# Supplementary material
Source: PubMed Central journal article supplement (PMC3982675)
Supplement: 0c0f3959ebcfcfbd448fd15df0009c85_genetics.114.161729-1.pdf [file 0c0f3959ebcfcfbd448fd15df0009c85_genetics.114.161729-1.pdf]

**Files S1-S2**

Available for download as .zip files at <http://www.genetics.org/lookup/suppl/doi:10.1534/genetics.114.161729/-/DC1>

**File S1** Phenotypic and experimental data

**File S2** Physical experimental data

**Table S1** Number of individuals for all factor levels of the experimental design.

| Cross   | Maturity | fresh | salt | clear | sediments | fresh:clear | fresh:sediments | salt:clear | salt:sediments | Overall |
|---------|----------|-------|------|-------|-----------|-------------|-----------------|------------|----------------|---------|
| WW      | immature | 17    | 16   | 15    | 18        | 6           | 11              | 9          | 7              | 33      |
| WW      | female   | 37    | 37   | 40    | 34        | 19          | 18              | 21         | 16             | 74      |
| WW      | male     | 40    | 35   | 37    | 38        | 22          | 18              | 15         | 20             | 75      |
| WW      | all      | 94    | 88   | 92    | 90        | 47          | 47              | 45         | 44             | 183     |
| BC      | immature | 49    | 43   | 45    | 47        | 27          | 22              | 18         | 25             | 92      |
| BC      | female   | 23    | 23   | 20    | 26        | 8           | 15              | 12         | 11             | 46      |
| BC      | male     | 23    | 21   | 25    | 19        | 13          | 10              | 12         | 9              | 44      |
| BC      | all      | 95    | 87   | 90    | 92        | 48          | 47              | 42         | 45             | 182     |
| F1      | immature | 49    | 51   | 53    | 47        | 24          | 25              | 29         | 22             | 100     |
| F1      | female   | 17    | 23   | 16    | 24        | 8           | 9               | 8          | 15             | 40      |
| F1      | male     | 29    | 26   | 28    | 27        | 15          | 14              | 13         | 13             | 55      |
| F1      | all      | 95    | 100  | 97    | 98        | 47          | 48              | 50         | 50             | 195     |
| F2      | immature | 54    | 52   | 59    | 47        | 30          | 24              | 29         | 23             | 106     |
| F2      | female   | 18    | 14   | 16    | 16        | 9           | 9               | 7          | 7              | 32      |
| F2      | male     | 24    | 27   | 20    | 31        | 9           | 15              | 11         | 16             | 51      |
| F2      | all      | 96    | 93   | 95    | 94        | 48          | 48              | 47         | 46             | 189     |
| DD      | immature | 38    | 47   | 45    | 40        | 19          | 19              | 26         | 21             | 85      |
| DD      | female   | 14    | 10   | 11    | 13        | 4           | 10              | 7          | 3              | 24      |
| DD      | male     | 40    | 37   | 39    | 38        | 24          | 16              | 15         | 22             | 77      |
| DD      | all      | 92    | 94   | 95    | 91        | 47          | 45              | 48         | 46             | 186     |
| Overall | all      | 472   | 462  | 469   | 465       | 237         | 235             | 232        | 230            | 934     |

Comments: Numbers are given for the three maturity groups (*Maturity*) between the crosses of wild (WW) and domesticated (DD) Atlantic salmon, reciprocal first- (F1) and second-generation hybrids (F2), and the reciprocal wild backcross (BC, WW x F1). Combinations of environmental factor levels for *Salinity* (levels: fresh, salt) and *Sediment* (levels: clear, sediments) are indicated by a colon. Results from an analysis of these occurrences, additionally accounting for occurrences for each tank, can be found in Table S2.

**Table S2 Results for the analysis of number of individuals among all study-design term levels.**

| Term                             | DF | DDF | F     | P       |
|----------------------------------|----|-----|-------|---------|
| Intercept                        | 1  | 4   | >1000 | < 0.001 |
| Sediment                         | 1  | 4   | 0.7   | 0.439   |
| Salinity                         | 1  | 4   | 1.6   | 0.277   |
| Cross                            | 4  | 56  | 0.7   | 0.606   |
| Maturity                         | 2  | 56  | 48.8  | < 0.001 |
| Sediment:Salinity                | 1  | 4   | 4.8   | 0.095   |
| Sediment:Cross                   | 4  | 56  | 0.2   | 0.916   |
| Salinity:Cross                   | 4  | 56  | 0.2   | 0.932   |
| Sediment:Maturity                | 2  | 56  | 0.5   | 0.632   |
| Salinity:Maturity                | 2  | 56  | 0.1   | 0.888   |
| Cross:Maturity                   | 8  | 56  | 20.6  | < 0.001 |
| Sediment:Salinity:Cross          | 4  | 56  | 0.4   | 0.781   |
| Sediment:Salinity:Maturity       | 2  | 56  | 2.9   | 0.061   |
| Sediment:Cross:Maturity          | 8  | 56  | 1.5   | 0.181   |
| Salinity:Cross:Maturity          | 8  | 56  | 0.8   | 0.577   |
| Sediment:Salinity:Cross:Maturity | 8  | 56  | 2.9   | 0.008   |

Comments: The response is log-transformed (Ln) number of individuals per *Cross-by-Maturity* level and tank. Interactions among terms are indicated by a colon. Given for each term are degrees of freedom (DF), denominator DF (DDF), *F*-statistic (*F*) and probability (*P*). Among-tank stratum variance was 0.0169 with 4 DF, residual stratum variance was 0.0725 with 56 DF.

**Table S3 Results for the selection of among-individual (co)variances model structures.**

| <sup>a</sup> Model(l)                       | k  | k(G) | k(I) | AIC      | BIC      | REML                                          | k   | k(G) | k(I) | AIC      | BIC      | REML    | X <sup>2</sup> | DF  | <sup>a</sup> P |
|---------------------------------------------|----|------|------|----------|----------|-----------------------------------------------|-----|------|------|----------|----------|---------|----------------|-----|----------------|
| Homogeneous variances for Cross-by-Maturity |    |      |      |          |          | Heterogeneous variances for Cross-by-Maturity |     |      |      |          |          |         |                |     |                |
| <b>A</b>                                    |    |      |      |          |          |                                               |     |      |      |          |          |         |                |     |                |
| GLM                                         | 5  | 4    | 1    | -4310.0  | -4277.8  | 2160.0                                        | 19  | 4    | 15   | -4548.4  | -4426.4  | 2293.2  | 266.5          | 14  | < 0.001        |
| GLMH                                        | 9  | 4    | 5    | -4295.0  | -4237.2  | 2156.5                                        | 79  | 4    | 75   | -4434.7  | -3927.3  | 2296.4  | 279.7          | 70  | < 0.001        |
| CS                                          | 13 | 11   | 2    | -14995.5 | -14912.0 | 7510.8                                        | cf  | cf   | 30   | cf       | cf       | cf      | NA             | NA  | NA             |
| CSH                                         | 16 | 10   | 6    | -15012.7 | -14910.0 | 7522.4                                        | 101 | 11   | 90   | -15063.1 | -14414.4 | 7632.6  | 220.4          | 85  | < 0.001        |
| AR(1)                                       | cf | cf   | 2    | cf       | cf       | cf                                            | cf  | cf   | 30   | cf       | cf       | cf      | NA             | NA  | NA             |
| ARH(1)                                      | cf | cf   | 6    | cf       | cf       | cf                                            | 104 | 14   | 90   | -16852.7 | -16184.7 | 8530.4  | NA             | NA  | NA             |
| ANTE(1)                                     | 20 | 11   | 9    | -17403.9 | -17275.2 | 8721.9                                        | 148 | 13   | 135  | -17466.9 | -16516.3 | 8881.5  | 319.1          | 128 | < 0.001        |
| ANTE(2)                                     | 26 | 14   | 12   | -17571.9 | -17404.9 | 8812.0                                        | 193 | 13   | 180  | -17581.5 | -16341.9 | 8983.8  | 343.6          | 167 | < 0.001        |
| ANTE(3)                                     | 28 | 14   | 14   | -17573.3 | -17393.5 | 8814.7                                        | 224 | 14   | 210  | -17582.7 | -16143.9 | 9015.3  | 401.3          | 196 | < 0.001        |
| UN                                          | 26 | 11   | 15   | -17555.7 | -17388.7 | 8803.9                                        | 235 | 10   | 225  | -17572.9 | -16063.5 | 9021.4  | 435.1          | 209 | < 0.001        |
| RC                                          | 21 | 18   | 3    | -16742.9 | -16608.0 | 8392.5                                        | 63  | 18   | 45   | -16774.9 | -16370.3 | 8450.4  | 116.0          | 42  | < 0.001        |
| RCS                                         | 19 | 15   | 4    | -17409.5 | -17287.4 | 8723.7                                        | 75  | 15   | 60   | -17448.3 | -16966.6 | 8799.1  | 150.8          | 56  | < 0.001        |
| RCSC                                        | 29 | 14   | 15   | -17400.2 | -17213.9 | 8729.1                                        | cf  | cf   | 225  | cf       | cf       | cf      | NA             | NA  | NA             |
| <b>B</b>                                    |    |      |      |          |          |                                               |     |      |      |          |          |         |                |     |                |
| GLM                                         | 4  | 3    | 1    | -15056.5 | -15030.8 | 7532.2                                        | 18  | 3    | 15   | -15321.5 | -15205.9 | 7678.8  | 293.1          | 14  | < 0.001        |
| GLMH                                        | 8  | 3    | 5    | -15052.6 | -15001.2 | 7534.3                                        | 78  | 3    | 75   | -15208.9 | -14707.9 | 7682.4  | 296.3          | 70  | < 0.001        |
| CS                                          | 9  | 7    | 2    | -28041.2 | -27983.4 | 14029.6                                       | 38  | 8    | 30   | -28220.5 | -27976.4 | 14148.2 | 237.3          | 29  | < 0.001        |
| CSH                                         | 12 | 6    | 6    | -28118.1 | -28041.0 | 14071.0                                       | 97  | 7    | 90   | -28324.6 | -27701.6 | 14259.3 | 376.6          | 85  | < 0.001        |
| AR(1)                                       | cf | cf   | 2    | cf       | cf       | cf                                            | cf  | cf   | 30   | cf       | cf       | cf      | NA             | NA  | NA             |
| ARH(1)                                      | cf | cf   | 6    | cf       | cf       | cf                                            | cf  | cf   | 90   | cf       | cf       | cf      | NA             | NA  | NA             |
| ANTE(1)                                     | 18 | 9    | 9    | -31127.0 | -31011.4 | 15581.5                                       | 144 | 9    | 135  | -31256.0 | -30331.1 | 15772.0 | 381.0          | 126 | < 0.001        |
| ANTE(2)                                     | cf | cf   | 12   | cf       | cf       | cf                                            | 187 | 7    | 180  | -31431.9 | -30230.9 | 15903.0 | NA             | NA  | NA             |
| ANTE(3)                                     | cf | cf   | 14   | cf       | cf       | cf                                            | 218 | 8    | 210  | -31506.7 | -30106.5 | 15971.3 | NA             | NA  | NA             |

| <sup>a</sup> Model(I) | k                                           | k(G) | k(I) | AIC      | BIC      | REML    | k                                             | k(G) | k(I) | AIC             | BIC             | REML    | X <sup>2</sup> | DF  | <sup>a</sup> P |
|-----------------------|---------------------------------------------|------|------|----------|----------|---------|-----------------------------------------------|------|------|-----------------|-----------------|---------|----------------|-----|----------------|
|                       | Homogeneous variances for Cross-by-Maturity |      |      |          |          |         | Heterogeneous variances for Cross-by-Maturity |      |      |                 |                 |         |                |     |                |
| UN                    | 28                                          | 13   | 15   | -31428.4 | -31248.6 | 15742.2 | 235                                           | 10   | 225  | <i>-31527.0</i> | -30017.6        | 15998.5 | 512.6          | 207 | < 0.001        |
| RC                    | 17                                          | 14   | 3    | -30771.2 | -30662.0 | 15402.6 | 60                                            | 15   | 45   | -30848.1        | -30462.7        | 15484.0 | 162.9          | 43  | < 0.001        |
| RCS                   | 22                                          | 18   | 4    | -31395.0 | -31253.7 | 15719.5 | 78                                            | 18   | 60   | -31517.1        | <i>-31016.1</i> | 15836.5 | 234.0          | 56  | 0.000          |
| RCSC                  | 33                                          | 18   | 15   | -31387.0 | -31175.1 | 15726.5 | cf                                            | cf   | 225  | cf              | cf              | cf      | NA             | NA  | NA             |

NA: evaluation not available

cf: convergence failed

The suffix 'H' to a model name indicates heterogeneous variances across *Time*

GLM: general linear model (common variance, no covariance)

CS: compound symmetry (common variance, common covariance)

AR(1): autoregressive order 1 (common variance, covariances decline exponentially between *Time* levels with increasing lag)

ANTE(i): antedependence of order i (heterogeneous variances across *Time*, heterogeneous covariances for distance between *Time* levels up to lag i)

UN: unstructured (heterogeneous variances across *Time*, heterogeneous covariances among all variances)

RC: random coefficients (variance for both individual intercepts and slopes, including the covariance between intercept and slope)

RCS: RC with individual splines (like RC but additional individual-based splines, independent of RC effects).

RCSC: RCS with all possible covariances among three spline variances and both RC variances (like RCS but splines are additionally not independent of the remaining RC effects)

<sup>a</sup>The comparisons are only approximations as among-group random effects terms varied among covariance structures and have not been tested for significance

Comments: Models are for response of body mass (A) or fork length (B). For each (co)variance model (Model(I)), the number of (co)variance parameters are indicated for the total (k), for among-groups (k(G)), and for among-individuals (k(I)). For each successfully fitted model, the AIC, BIC (both in "smaller is better" form, best model for each trait in italic) and the log residual maximum likelihood (REML) are given. Each among-individual covariance model was fitted with either homogeneous or heterogeneous parameters among the 15 *Cross-by-Maturity* groups. For each model, the improvement in model fit by the heterogeneous version was assessed by likelihood ratio test (LRT) for which the

test statistic ( $\chi^2$ ), degrees of freedom (DF), and the approximated probability (P) are given. As the heteroscedastic models were always better as clearly indicated by LRTs, we ignored the homoscedastic versions for among-model comparisons. All models were fitted with the same fixed full structure (*Sediment\*Salinity\*Cross\*Maturity\*Time*) and with all possible random spline (*spl(Time)*) and random deviation (*dev(Time)*) among-group terms (*spl(Time)/(Sediment\*Salinity\*Cross\*Maturity)+dev(Time)/(Sediment\*Salinity\*Cross\*Maturity)*). In the model equation asterisks indicate factor crossing (main effects plus interactions), and slashes indicates nesting (main effects to the left of the slash plus their interactions with effects to the right of the slash). Furthermore, all models were fitted with error terms for tank identification (*Tank*), and *Tank:Time*, as well as random spline and deviation terms for *Tank*. All random parameters that converged to zero were removed before model evaluation except for *Tank* and *Tank:Time* which were always retained to account for the splits-plot design. As models account differently for the variance across *Time*, parameters that converged to zero differed among models and that is the reason why k(G) differ among models.

**Table S4 Variance parameters for the overall and maturity-group-specific growth models of body mass.**

| Term                                              | Var      | SE      | Var/SE | $\chi^2_1$ | P      |
|---------------------------------------------------|----------|---------|--------|------------|--------|
| <b>A overall</b>                                  |          |         |        |            |        |
| <i>spl(Time)</i>                                  | 7.0E-05  | 1.7E-04 | 0.4    | 0.2        | 0.643  |
| <i>spl(Time):Sediment</i>                         | 1.1E-04  | 1.1E-04 | 1.0    | 7.3        | 0.007  |
| <i>spl(Time):Cross:Maturity</i>                   | 5.3E-05  | 1.9E-05 | 2.7    | 52.2       | <0.001 |
| <i>dev(Time):Maturity</i>                         | 1.5E-04  | 1.1E-04 | 1.4    | 19.4       | <0.001 |
| <i>Sediment:Salinity:Cross:Maturity:dev(Time)</i> | 3.3E-05  | 1.1E-05 | 3.0    | 18.3       | <0.001 |
| <sup>a</sup> Tank                                 | 2.9E-09  | 1.4E-10 | 20.8   | NA         | NA     |
| <sup>a</sup> Tank: <i>Time</i>                    | 5.2E-11  | 2.5E-12 | 20.8   | NA         | NA     |
| Tank: <i>dev(Time)</i>                            | 7.4E-05  | 2.7E-05 | 2.7    | 94.3       | <0.001 |
| WW-females intercept                              | 7.4E-02  | 1.2E-02 | 6.0    |            |        |
| WW-females cov(intercept, slope)                  | 1.7E-05  | 3.9E-04 | 0.0    |            |        |
| WW-females: <i>Time</i>                           | 1.4E-04  | 2.5E-05 | 5.5    |            |        |
| WW-males intercept                                | 9.7E-02  | 1.6E-02 | 6.0    |            |        |
| WW-males cov(intercept, slope)                    | 3.8E-04  | 4.7E-04 | 0.8    |            |        |
| WW-males: <i>Time</i>                             | 1.6E-04  | 2.8E-05 | 5.6    |            |        |
| WW- immature intercept                            | 8.5E-02  | 2.2E-02 | 4.0    |            |        |
| WW- immature cov(intercept, slope)                | 1.5E-04  | 8.3E-04 | 0.2    |            |        |
| WW- immature: <i>Time</i>                         | 2.4E-04  | 6.4E-05 | 3.8    |            |        |
| BC-females intercept                              | 2.1E-01  | 4.5E-02 | 4.7    |            |        |
| BC-females cov(intercept, slope)                  | 2.7E-04  | 9.6E-04 | 0.3    |            |        |
| BC-females: <i>Time</i>                           | 1.8E-04  | 4.0E-05 | 4.4    |            |        |
| BC-males intercept                                | 1.1E-01  | 2.4E-02 | 4.6    |            |        |
| BC-males cov(intercept, slope)                    | 6.7E-04  | 8.2E-04 | 0.8    |            |        |
| BC-males: <i>Time</i>                             | 2.4E-04  | 5.4E-05 | 4.4    |            |        |
| BC- immature intercept                            | 8.6E-02  | 1.3E-02 | 6.7    |            |        |
| BC- immature cov(intercept, slope)                | -2.1E-04 | 5.2E-04 | -0.4   |            |        |
| BC- immature: <i>Time</i>                         | 2.7E-04  | 4.1E-05 | 6.4    |            |        |
| F1-females intercept                              | 1.8E-01  | 4.0E-02 | 4.4    |            |        |
| F1-females cov(intercept, slope)                  | 2.5E-03  | 1.0E-03 | 2.4    |            |        |
| F1-females: <i>Time</i>                           | 1.9E-04  | 4.6E-05 | 4.1    |            |        |
| F1-males intercept                                | 1.5E-01  | 2.8E-02 | 5.2    |            |        |
| F1-males cov(intercept, slope)                    | 1.8E-03  | 8.1E-04 | 2.3    |            |        |
| F1-males: <i>Time</i>                             | 2.1E-04  | 4.3E-05 | 4.9    |            |        |
| F1- immature intercept                            | 1.4E-01  | 2.0E-02 | 7.0    |            |        |
| F1- immature cov(intercept, slope)                | 2.1E-03  | 6.6E-04 | 3.2    |            |        |
| F1- immature: <i>Time</i>                         | 2.6E-04  | 3.9E-05 | 6.7    |            |        |

| Term                                                                 | Var      | SE      | Var/SE | $X_1^2$ | P     |
|----------------------------------------------------------------------|----------|---------|--------|---------|-------|
| F2-females intercept                                                 | 1.2E-01  | 3.0E-02 | 3.9    |         |       |
| F2-females cov(intercept, slope)                                     | 1.1E-03  | 9.3E-04 | 1.2    |         |       |
| F2-females: <i>Time</i>                                              | 2.0E-04  | 5.4E-05 | 3.7    |         |       |
| F2-males intercept                                                   | 1.6E-01  | 3.3E-02 | 5.0    |         |       |
| F2-males cov(intercept, slope)                                       | -1.1E-03 | 8.6E-04 | -1.2   |         |       |
| F2-males: <i>Time</i>                                                | 2.0E-04  | 4.3E-05 | 4.7    |         |       |
| F2- immature intercept                                               | 8.2E-02  | 1.1E-02 | 7.2    |         |       |
| F2-immature cov(intercept, slope)                                    | 1.2E-04  | 4.1E-04 | 0.3    |         |       |
| F2- immature: <i>Time</i>                                            | 2.0E-04  | 3.0E-05 | 6.8    |         |       |
| DD-females intercept                                                 | 4.7E-02  | 1.4E-02 | 3.4    |         |       |
| DD-females cov(intercept, slope)                                     | 1.0E-03  | 7.9E-04 | 1.3    |         |       |
| DD-females: <i>Time</i>                                              | 2.6E-04  | 8.2E-05 | 3.2    |         |       |
| DD-males intercept                                                   | 9.6E-02  | 1.6E-02 | 6.1    |         |       |
| DD-males cov(intercept, slope)                                       | 1.7E-03  | 7.0E-04 | 2.5    |         |       |
| DD-males: <i>Time</i>                                                | 3.4E-04  | 5.8E-05 | 5.9    |         |       |
| DD- immature intercept                                               | 6.7E-02  | 1.0E-02 | 6.4    |         |       |
| DD-immature cov(intercept, slope)                                    | 1.7E-03  | 6.1E-04 | 2.7    |         |       |
| DD- immature: <i>Time</i>                                            | 4.0E-04  | 6.4E-05 | 6.3    |         |       |
| WW-females:spl( <i>Time</i> )                                        | 2.4E-04  | 4.5E-05 | 5.3    |         |       |
| WW-males:spl( <i>Time</i> )                                          | 1.6E-04  | 3.3E-05 | 4.8    |         |       |
| WW-immature:spl( <i>Time</i> )                                       | 2.0E-04  | 5.8E-05 | 3.4    |         |       |
| BC-females:spl( <i>Time</i> )                                        | 2.1E-04  | 4.9E-05 | 4.4    |         |       |
| BC-males:spl( <i>Time</i> )                                          | 2.1E-04  | 5.6E-05 | 3.8    |         |       |
| BC-immature:spl( <i>Time</i> )                                       | 2.6E-04  | 4.3E-05 | 6.1    |         |       |
| F1-females:spl( <i>Time</i> )                                        | 4.3E-04  | 9.8E-05 | 4.4    |         |       |
| F1-males:spl( <i>Time</i> )                                          | 1.6E-04  | 4.0E-05 | 4.0    |         |       |
| F1-immature:spl( <i>Time</i> )                                       | 2.1E-04  | 3.4E-05 | 6.1    |         |       |
| F2-females:spl( <i>Time</i> )                                        | 3.9E-04  | 1.1E-04 | 3.7    |         |       |
| F2-males:spl( <i>Time</i> )                                          | 2.1E-04  | 5.1E-05 | 4.1    |         |       |
| F2-immature):IND:spl( <i>Time</i> )                                  | 2.3E-04  | 3.8E-05 | 6.2    |         |       |
| DD-females:spl( <i>Time</i> )                                        | 7.3E-04  | 2.0E-04 | 3.7    |         |       |
| DD-males:spl( <i>Time</i> )                                          | 3.0E-04  | 5.4E-05 | 5.6    |         |       |
| DD-immature:spl( <i>Time</i> )                                       | 2.3E-04  | 4.0E-05 | 5.7    |         |       |
| Residuals                                                            | 5.1E-04  | 2.5E-05 | 20.8   |         |       |
| <b>B immature</b>                                                    |          |         |        |         |       |
| spl( <i>Time</i> )                                                   | 4.0E-04  | 3.8E-04 | 1.1    | 2.9     | 0.089 |
| spl( <i>Time</i> ): <i>Sediment</i>                                  | 7.4E-05  | 8.6E-05 | 0.9    | 4.2     | 0.040 |
| spl( <i>Time</i> ): <i>Sediment</i> : <i>Salinity</i> : <i>Cross</i> | 2.4E-05  | 1.3E-05 | 1.9    | 7.3     | 0.007 |

| Term                            | Var      | SE      | Var/SE | $X_1^2$ | P      |
|---------------------------------|----------|---------|--------|---------|--------|
| <i>Sediment:Cross:dev(Time)</i> | 1.9E-05  | 1.5E-05 | 1.3    | 3.8     | 0.051  |
| <sup>a</sup> Tank               | NA       | NA      | NA     | NA      | NA     |
| <sup>a</sup> Tank:Time          | NA       | NA      | NA     | NA      | NA     |
| Tank:dev(Time)                  | 8.2E-05  | 3.4E-05 | 2.4    | 58.4    | <0.001 |
| WW intercept                    | 8.2E-02  | 2.1E-02 | 4.0    |         |        |
| WW cov(intercept, slope)        | 2.1E-04  | 8.1E-04 | 0.3    |         |        |
| WW:Time                         | 2.4E-04  | 6.3E-05 | 3.8    |         |        |
| BC intercept                    | 8.6E-02  | 1.3E-02 | 6.7    |         |        |
| BC cov(intercept, slope)        | -2.8E-04 | 5.2E-04 | -0.5   |         |        |
| BC:Time                         | 2.8E-04  | 4.3E-05 | 6.5    |         |        |
| F1 intercept                    | 1.4E-01  | 2.0E-02 | 7.0    |         |        |
| F1 cov(intercept, slope)        | 2.1E-03  | 6.7E-04 | 3.2    |         |        |
| F1:Time                         | 2.7E-04  | 4.0E-05 | 6.7    |         |        |
| F2 intercept                    | 8.1E-02  | 1.1E-02 | 7.2    |         |        |
| F2 cov(intercept, slope)        | 1.4E-04  | 4.1E-04 | 0.3    |         |        |
| F2:Time                         | 2.0E-04  | 2.9E-05 | 6.9    |         |        |
| DD intercept                    | 7.0E-02  | 1.1E-02 | 6.4    |         |        |
| DD cov(intercept, slope)        | 1.8E-03  | 6.2E-04 | 2.9    |         |        |
| DD:Time                         | 4.1E-04  | 6.4E-05 | 6.3    |         |        |
| WWspl(Time)                     | 2.1E-04  | 6.0E-05 | 3.5    |         |        |
| BC:spl(Time)                    | 3.0E-04  | 4.7E-05 | 6.3    |         |        |
| F1:spl(Time)                    | 2.4E-04  | 3.7E-05 | 6.4    |         |        |
| F2:spl(Time)                    | 2.8E-04  | 4.3E-05 | 6.5    |         |        |
| DD:spl(Time)                    | 2.6E-04  | 4.4E-05 | 5.9    |         |        |
| Residuals                       | 4.1E-04  | 3.2E-05 | 12.9   |         |        |
| <b>C females</b>                |          |         |        |         |        |
| <i>spl(Time):Sediment</i>       | 2.6E-04  | 1.9E-04 | 1.4    | 12.9    | <0.001 |
| <i>spl(Time):Cross</i>          | 5.0E-05  | 3.4E-05 | 1.5    | 9.4     | 0.002  |
| <sup>a</sup> Tank               | NA       | NA      | NA     | NA      | NA     |
| <sup>a</sup> Tank:Time          | NA       | NA      | NA     | NA      | NA     |
| <i>dev(Time):Tank</i>           | 7.4E-05  | 3.9E-05 | 1.9    | 12.4    | <0.001 |
| WW intercept                    | 7.5E-02  | 1.2E-02 | 6.0    |         |        |
| WW cov(intercept, slope)        | 1.9E-05  | 3.9E-04 | 0.0    |         |        |
| WW:Time                         | 1.4E-04  | 2.5E-05 | 5.4    |         |        |
| BC intercept                    | 2.1E-01  | 4.5E-02 | 4.7    |         |        |
| BC cov(intercept, slope)        | 2.9E-04  | 9.5E-04 | 0.3    |         |        |
| BC:Time                         | 1.8E-04  | 4.0E-05 | 4.4    |         |        |
| F1 intercept                    | 1.7E-01  | 3.9E-02 | 4.4    |         |        |

| Term                     | Var      | SE      | Var/SE | $X_1^2$ | P      |
|--------------------------|----------|---------|--------|---------|--------|
| F1 cov(intercept, slope) | 2.5E-03  | 1.0E-03 | 2.5    |         |        |
| F1:Time                  | 1.8E-04  | 4.5E-05 | 4.1    |         |        |
| F2 intercept             | 1.2E-01  | 3.0E-02 | 3.9    |         |        |
| F2 cov(intercept, slope) | 1.1E-03  | 9.4E-04 | 1.2    |         |        |
| F2:Time                  | 2.1E-04  | 5.6E-05 | 3.7    |         |        |
| DD intercept             | 4.8E-02  | 1.4E-02 | 3.4    |         |        |
| DD cov(intercept, slope) | 1.1E-03  | 8.0E-04 | 1.4    |         |        |
| DD:Time                  | 2.6E-04  | 8.2E-05 | 3.2    |         |        |
| WWspl(Time)              | 2.1E-04  | 4.4E-05 | 4.9    |         |        |
| BC:spl(Time)             | 2.0E-04  | 4.8E-05 | 4.1    |         |        |
| F1:spl(Time)             | 3.9E-04  | 9.3E-05 | 4.2    |         |        |
| F2:spl(Time)             | 3.4E-04  | 1.0E-04 | 3.4    |         |        |
| DD:spl(Time)             | 7.4E-04  | 2.1E-04 | 3.6    |         |        |
| Residuals                | 6.1E-04  | 5.9E-05 | 10.3   |         |        |
| <b>D males</b>           |          |         |        |         |        |
| spl(Time):Cross          | 1.5E-04  | 7.0E-05 | 2.1    | 89.3    | <0.001 |
| Sediment:dev(Time)       | 1.5E-04  | 1.2E-04 | 1.3    | 12.4    | <0.001 |
| <sup>a</sup> Tank        | NA       | NA      | NA     | NA      | NA     |
| Tank:Time                | 1.3E-06  | 4.3E-06 | 0.3    | 0.1     | 0.756  |
| Tank:spl(Time)           | 3.8E-05  | 2.0E-05 | 1.9    | 20.9    | <0.001 |
| WW intercept             | 9.9E-02  | 1.6E-02 | 6.0    |         |        |
| WW cov(intercept, slope) | 3.8E-04  | 4.8E-04 | 0.8    |         |        |
| WW:Time                  | 1.6E-04  | 2.8E-05 | 5.6    |         |        |
| BC intercept             | 1.1E-01  | 2.4E-02 | 4.6    |         |        |
| BC cov(intercept, slope) | 5.8E-04  | 8.1E-04 | 0.7    |         |        |
| BC:Time                  | 2.4E-04  | 5.4E-05 | 4.3    |         |        |
| F1 intercept             | 1.4E-01  | 2.8E-02 | 5.2    |         |        |
| F1 cov(intercept, slope) | 1.8E-03  | 8.4E-04 | 2.1    |         |        |
| F1:Time                  | 2.3E-04  | 4.7E-05 | 4.9    |         |        |
| F2 intercept             | 1.6E-01  | 3.3E-02 | 5.0    |         |        |
| F2 cov(intercept, slope) | -1.1E-03 | 8.6E-04 | -1.2   |         |        |
| F2:Time                  | 2.1E-04  | 4.4E-05 | 4.7    |         |        |
| DD intercept             | 9.7E-02  | 1.6E-02 | 6.1    |         |        |
| DD cov(intercept, slope) | 1.7E-03  | 7.0E-04 | 2.4    |         |        |
| DD:Time                  | 3.3E-04  | 5.7E-05 | 5.9    |         |        |
| WWspl(Time)              | 1.4E-04  | 3.3E-05 | 4.4    |         |        |
| BC:spl(Time)             | 1.8E-04  | 5.1E-05 | 3.4    |         |        |
| F1:spl(Time)             | 1.4E-04  | 3.9E-05 | 3.7    |         |        |

| <b>Term</b>           | <b>Var</b> | <b>SE</b> | <b>Var/SE</b> | <b><math>\chi^2_1</math></b> | <b>P</b> |
|-----------------------|------------|-----------|---------------|------------------------------|----------|
| F2:spl( <i>Time</i> ) | 1.6E-04    | 4.6E-05   | 3.6           |                              |          |
| DD:spl( <i>Time</i> ) | 2.8E-04    | 5.4E-05   | 5.2           |                              |          |
| Residuals             | 6.0E-04    | 4.7E-05   | 12.7          |                              |          |

<sup>a</sup>Variance was constrained to be positive and converged to zero.

Comments: Parameters are given for the overall model (**A**), and for maturity groups of immature individuals (**B**), females (**C**), and males (**D**). A colon between terms indicates the formation of the interaction. Some terms contain splines (spl(*Time*)) and deviations (dev(*Time*)) from linear trajectories. Among-individual (co)variances are given for each cross. Crosses are abbreviated with WW, wild; F1, first-generation hybrid; F2, second-generation hybrid; and DD, domesticated Atlantic salmon. The covariance between among-individual variances for intercepts and slopes (interaction of individual with *Time*) is abbreviated by 'cov'. For all among-group variance parameters, the results from REML-likelihood ratio tests (LRT) are given as test-statistic ( $\chi^2$ , all with 1 degree of freedom) and probability of being different from zero (P). LRT results for among-individual (co)variance terms are reported in supplementary Table S3.

**Table S5 Variance parameters for the overall and maturity-group-specific growth models of fork length.**

| Term                               | Var      | SE      | Var/SE | $\chi^2_1$ | P      |
|------------------------------------|----------|---------|--------|------------|--------|
| <b>A: overall</b>                  |          |         |        |            |        |
| <i>spl(Time):Maturity</i>          | 6.6E-06  | 4.0E-06 | 1.7    | 24.2       | <0.001 |
| <i>spl(Time):Cross:Maturity</i>    | 5.6E-07  | 2.7E-07 | 2.1    | 15.6       | <0.001 |
| <i>dev(Time)</i>                   | 3.2E-06  | 5.0E-06 | 0.6    | 1.5        | 0.219  |
| <i>Sediment:Salinity:dev(Time)</i> | 2.5E-06  | 1.7E-06 | 1.5    | 3.0        | 0.083  |
| <i>Sediment:Cross:dev(Time)</i>    | 2.3E-07  | 2.0E-07 | 1.2    | 2.7        | 0.101  |
| <i>Sediment:Maturity:dev(Time)</i> | 8.1E-07  | 6.3E-07 | 1.3    | 8.4        | 0.004  |
| <sup>a</sup> Tank                  | NA       | NA      | NA     | NA         | NA     |
| Tank:lin( <i>Time</i> )            | 1.6E-08  | 8.0E-08 | 0.2    | 0.05       | 0.829  |
| Tank:spl( <i>Time</i> )            | 7.1E-07  | 4.1E-07 | 1.7    | 24.6       | <0.001 |
| WW-females:spl( <i>Time</i> )      | 5.2E-06  | 1.1E-06 | 4.8    |            |        |
| WW-males:spl( <i>Time</i> )        | 2.6E-06  | 7.0E-07 | 3.8    |            |        |
| WW-immature:spl( <i>Time</i> )     | 9.9E-06  | 2.7E-06 | 3.7    |            |        |
| BC-females:spl( <i>Time</i> )      | 5.6E-06  | 1.4E-06 | 4.0    |            |        |
| BC-males:spl( <i>Time</i> )        | 4.5E-06  | 1.3E-06 | 3.5    |            |        |
| BC-immature:spl( <i>Time</i> )     | 9.0E-06  | 1.5E-06 | 6.0    |            |        |
| F1-females:spl( <i>Time</i> )      | 1.2E-05  | 2.7E-06 | 4.4    |            |        |
| F1-males:spl( <i>Time</i> )        | 4.0E-06  | 1.0E-06 | 3.8    |            |        |
| F1-immature:spl( <i>Time</i> )     | 6.4E-06  | 1.1E-06 | 5.7    |            |        |
| F2-females:spl( <i>Time</i> )      | 9.0E-06  | 2.5E-06 | 3.7    |            |        |
| F2-males:spl( <i>Time</i> )        | 2.7E-06  | 8.8E-07 | 3.1    |            |        |
| F2-immature:spl( <i>Time</i> )     | 7.2E-06  | 1.2E-06 | 6.0    |            |        |
| DD-females:spl( <i>Time</i> )      | 1.9E-05  | 5.2E-06 | 3.5    |            |        |
| DD-males:spl( <i>Time</i> )        | 1.1E-05  | 2.0E-06 | 5.4    |            |        |
| DD-immature:spl( <i>Time</i> )     | 1.2E-05  | 2.1E-06 | 5.9    |            |        |
| WW-females intercept               | 6.8E-03  | 1.1E-03 | 6.0    |            |        |
| WW-females cov(intercept, slope)   | -3.9E-05 | 3.0E-05 | -1.3   |            |        |
| WW-females:Time                    | 9.1E-06  | 1.6E-06 | 5.7    |            |        |
| WW-males intercept                 | 1.1E-02  | 1.8E-03 | 6.1    |            |        |
| WW-males cov(intercept, slope)     | -6.0E-05 | 3.2E-05 | -1.8   |            |        |
| WW-males:Time                      | 6.5E-06  | 1.1E-06 | 5.7    |            |        |
| WW- immature intercept             | 6.6E-03  | 1.7E-03 | 4.0    |            |        |
| WW- immature cov(intercept, slope) | -5.8E-05 | 7.6E-05 | -0.8   |            |        |
| WW- immature:Time                  | 2.7E-05  | 6.8E-06 | 3.9    |            |        |
| BC-females intercept               | 2.0E-02  | 4.3E-03 | 4.7    |            |        |
| BC-females cov(intercept, slope)   | -1.5E-04 | 8.0E-05 | -1.8   |            |        |

| Term                              | Var      | SE       | Var/SE | $X_1^2$ | P     |
|-----------------------------------|----------|----------|--------|---------|-------|
| BC-females: <i>Time</i>           | 1.3E-05  | 2.8E-06  | 4.6    |         |       |
| BC-males intercept                | 1.3E-02  | 2.7E-03  | 4.6    |         |       |
| BC-males cov(intercept, slope)    | -9.7E-05 | 6.6E-05  | -1.5   |         |       |
| BC-males: <i>Time</i>             | 1.4E-05  | 3.0E-06  | 4.5    |         |       |
| BC- immature intercept            | 8.2E-03  | 1.2E-03  | 6.7    |         |       |
| BC-immature cov(intercept, slope) | -9.5E-05 | 3.8E-05  | -2.5   |         |       |
| BC- immature: <i>Time</i>         | 1.4E-05  | 2.2E-06  | 6.5    |         |       |
| F1-females intercept              | 1.6E-02  | 3.6E-03  | 4.4    |         |       |
| F1-females cov(intercept, slope)  | 3.5E-05  | 7.3E-05  | 0.5    |         |       |
| F1-females: <i>Time</i>           | 1.3E-05  | 3.0E-06  | 4.2    |         |       |
| F1-males intercept                | 1.5E-02  | 2.8E-03  | 5.2    |         |       |
| F1-males cov(intercept, slope)    | 2.4E-05  | 5.7E-05  | 0.4    |         |       |
| F1-males: <i>Time</i>             | 1.1E-05  | 2.3E-06  | 5.0    |         |       |
| F1- immature intercept            | 1.2E-02  | 1.7E-03  | 7.0    |         |       |
| F1-immature cov(intercept, slope) | 6.7E-05  | 4.1E-05  | 1.6    |         |       |
| F1- immature: <i>Time</i>         | 1.3E-05  | 2.0E-06  | 6.8    |         |       |
| F2-females intercept              | 1.1E-02  | 2.8E-03  | 3.9    |         |       |
| F2-females cov(intercept, slope)  | -1.2E-04 | 6.7E-05  | -1.7   |         |       |
| F2-females: <i>Time</i>           | 1.1E-05  | 2.8E-06  | 3.8    |         |       |
| F2-males intercept                | 1.8E-02  | 3.7E-03  | 5.0    |         |       |
| F2-males cov(intercept, slope)    | -1.6E-04 | 6.3E-05  | -2.5   |         |       |
| F2-males: <i>Time</i>             | 8.9E-06  | 1.9E-06  | 4.7    |         |       |
| F2- immature intercept            | 8.0E-03  | 1.1E-03  | 7.2    |         |       |
| F2-immature cov(intercept, slope) | -9.9E-05 | 3.1E-05  | -3.1   |         |       |
| F2- immature: <i>Time</i>         | 1.1E-05  | 1.6E-06  | 6.9    |         |       |
| DD-females intercept              | 4.9E-03  | 1.4E-03  | 3.4    |         |       |
| DD-females cov(intercept, slope)  | 7.8E-05  | 8.1E-05  | 1.0    |         |       |
| DD-females: <i>Time</i>           | 2.9E-05  | 8.7E-06  | 3.3    |         |       |
| DD-males intercept                | 9.3E-03  | 1.5E-03  | 6.1    |         |       |
| DD-males cov(intercept, slope)    | 4.7E-05  | 5.2E-05  | 0.9    |         |       |
| DD-males: <i>Time</i>             | 2.1E-05  | 3.5E-06  | 6.0    |         |       |
| DD- immature intercept            | 5.8E-03  | 9.0E-04  | 6.4    |         |       |
| DD-immature cov(intercept, slope) | 4.3E-05  | 4.0E-05  | 1.1    |         |       |
| DD- immature: <i>Time</i>         | 2.2E-05  | 3.5E-06  | 6.3    |         |       |
| Residuals                         | 2.0E-05  | 8.6E-07  | 23.0   |         |       |
| <b>B: immature</b>                |          |          |        |         |       |
| spl( <i>Time</i> )                | 1.20E-05 | 2.15E-05 | 0.6    | 0.5     | 0.462 |
| spl( <i>Time</i> ): <i>Cross</i>  | 8.76E-07 | 6.43E-07 | 1.4    | 8.3     | 0.004 |

| Term                            | Var       | SE       | Var/SE | $X_1^2$ | P      |
|---------------------------------|-----------|----------|--------|---------|--------|
| <i>spl(Time):Sediment</i>       | 2.57E-06  | 2.72E-06 | 0.9    | 11.3    | <0.001 |
| <i>spl(Time):Salinity</i>       | 1.66E-06  | 2.07E-06 | 0.8    | 2.7     | 0.100  |
| <i>dev(Time)</i>                | 9.84E-06  | 1.98E-05 | 0.5    | 0.5     | 0.474  |
| <i>Salinity:Cross:dev(Time)</i> | 9.07E-07  | 6.70E-07 | 1.4    | 4.1     | 0.042  |
| <i>dev(Time):Tank</i>           | 2.30E-06  | 1.16E-06 | 2.0    | 22.6    | <0.001 |
| <sup>a</sup> Tank               | NA        | NA       | NA     | NA      | NA     |
| Tank:lin( <i>Time</i> )         | 2.33E-12  | 1.51E-13 | 15.4   | 1.6     | 0.204  |
| WW: <i>spl(Time)</i>            | 9.31E-06  | 2.62E-06 | 3.6    |         |        |
| BC: <i>spl(Time)</i>            | 8.29E-06  | 1.47E-06 | 5.6    |         |        |
| F1: <i>spl(Time)</i>            | 5.80E-06  | 1.10E-06 | 5.3    |         |        |
| F2: <i>spl(Time)</i>            | 6.29E-06  | 1.13E-06 | 5.6    |         |        |
| DD: <i>spl(Time)</i>            | 1.07E-05  | 1.93E-06 | 5.5    |         |        |
| WW intercept                    | 6.46E-03  | 1.63E-03 | 4.0    |         |        |
| WW cov(intercept, slope)        | -4.58E-05 | 7.43E-05 | -0.6   |         |        |
| WW: <i>Time</i>                 | 2.61E-05  | 6.68E-06 | 3.9    |         |        |
| BC intercept                    | 8.17E-03  | 1.22E-03 | 6.7    |         |        |
| BC cov(intercept, slope)        | -9.47E-05 | 3.82E-05 | -2.5   |         |        |
| BC: <i>Time</i>                 | 1.44E-05  | 2.22E-06 | 6.5    |         |        |
| F1 intercept                    | 1.20E-02  | 1.70E-03 | 7.0    |         |        |
| F1 cov(intercept, slope)        | 6.56E-05  | 4.16E-05 | 1.6    |         |        |
| F1: <i>Time</i>                 | 1.34E-05  | 1.99E-06 | 6.7    |         |        |
| F2 intercept                    | 7.88E-03  | 1.10E-03 | 7.2    |         |        |
| F2 cov(intercept, slope)        | -9.83E-05 | 3.08E-05 | -3.2   |         |        |
| F2: <i>Time</i>                 | 1.07E-05  | 1.56E-06 | 6.9    |         |        |
| DD intercept                    | 5.88E-03  | 9.24E-04 | 6.4    |         |        |
| DD cov(intercept, slope)        | 4.60E-05  | 4.03E-05 | 1.1    |         |        |
| DD: <i>Time</i>                 | 2.20E-05  | 3.48E-06 | 6.3    |         |        |
| Residuals                       | 2.30E-05  | 1.49E-06 | 15.4   |         |        |
| <b>C: females</b>               |           |          |        |         |        |
| <i>spl(Time)</i>                | 2.6E-06   | 3.7E-06  | 0.7    | 2.5     | 0.112  |
| <i>spl(Time):Tank</i>           | 1.2E-06   | 7.1E-07  | 1.7    | 9.5     | 0.002  |
| <i>Sediment:dev(Time)</i>       | 3.2E-06   | 3.3E-06  | 1.0    | 3.9     | 0.049  |
| <sup>a</sup> Tank               | NA        | NA       | NA     | NA      | NA     |
| Tank:lin( <i>Time</i> )         | 5.0E-07   | 5.3E-07  | 0.9    | 1.6     | 0.204  |
| WW: <i>spl(Time)</i>            | 5.3E-06   | 1.1E-06  | 4.9    |         |        |
| BC: <i>spl(Time)</i>            | 6.5E-06   | 1.6E-06  | 4.1    |         |        |
| F1: <i>spl(Time)</i>            | 1.1E-05   | 2.6E-06  | 4.4    |         |        |
| F2: <i>spl(Time)</i>            | 1.0E-05   | 2.7E-06  | 3.8    |         |        |

| Term                                 | Var       | SE       | Var/SE | $X_1^2$ | P      |
|--------------------------------------|-----------|----------|--------|---------|--------|
| DD:spl( <i>Time</i> )                | 2.4E-05   | 6.3E-06  | 3.8    |         |        |
| WW intercept                         | 6.7E-03   | 1.1E-03  | 6.0    |         |        |
| WW cov(intercept, slope)             | -4.2E-05  | 3.0E-05  | -1.4   |         |        |
| WW: <i>Time</i>                      | 8.9E-06   | 1.6E-06  | 5.7    |         |        |
| BC intercept                         | 2.0E-02   | 4.3E-03  | 4.7    |         |        |
| BC cov(intercept, slope)             | -1.4E-04  | 7.8E-05  | -1.8   |         |        |
| BC: <i>Time</i>                      | 1.2E-05   | 2.7E-06  | 4.5    |         |        |
| F1 intercept                         | 1.5E-02   | 3.5E-03  | 4.4    |         |        |
| F1 cov(intercept, slope)             | 4.0E-05   | 7.3E-05  | 0.5    |         |        |
| F1: <i>Time</i>                      | 1.3E-05   | 3.1E-06  | 4.2    |         |        |
| F2 intercept                         | 1.1E-02   | 2.8E-03  | 3.9    |         |        |
| F2 cov(intercept, slope)             | -9.8E-05  | 6.8E-05  | -1.4   |         |        |
| F2: <i>Time</i>                      | 1.1E-05   | 3.1E-06  | 3.7    |         |        |
| DD intercept                         | 4.8E-03   | 1.4E-03  | 3.4    |         |        |
| DD cov(intercept, slope)             | 7.7E-05   | 7.9E-05  | 1.0    |         |        |
| DD: <i>Time</i>                      | 2.8E-05   | 8.6E-06  | 3.3    |         |        |
| Residuals                            | 1.7E-05   | 1.6E-06  | 10.9   |         |        |
| <b>D: males</b>                      |           |          |        |         |        |
| spl( <i>Time</i> )                   | 1.46E-06  | 1.82E-06 | 0.8    | 8.6     | 0.003  |
| Tank                                 | 5.04E-05  | 2.14E-04 | 0.2    | 0.1     | 0.806  |
| <sup>a</sup> Tank:lin( <i>Time</i> ) | NA        | NA       | NA     | NA      | NA     |
| Cross:dev( <i>Time</i> )             | 6.42E-07  | 4.92E-07 | 1.3    | 5.7     | 0.017  |
| Sediment:Salinity:dev( <i>Time</i> ) | 3.24E-06  | 1.63E-06 | 2.0    | 61.6    | <0.001 |
| WW:spl( <i>Time</i> )                | 2.82E-06  | 7.07E-07 | 4.0    |         |        |
| BC:spl( <i>Time</i> )                | 5.04E-06  | 1.37E-06 | 3.7    |         |        |
| F1:spl( <i>Time</i> )                | 4.82E-06  | 1.16E-06 | 4.1    |         |        |
| F2:spl( <i>Time</i> )                | 3.02E-06  | 8.99E-07 | 3.4    |         |        |
| DD:spl( <i>Time</i> )                | 1.30E-05  | 2.29E-06 | 5.7    |         |        |
| WW intercept                         | 1.08E-02  | 1.80E-03 | 6.0    |         |        |
| WW cov(intercept, slope)             | -6.33E-05 | 3.29E-05 | -1.9   |         |        |
| WW: <i>Time</i>                      | 6.55E-06  | 1.14E-06 | 5.7    |         |        |
| BC intercept                         | 1.25E-02  | 2.72E-03 | 4.6    |         |        |
| BC cov(intercept, slope)             | -9.85E-05 | 6.59E-05 | -1.5   |         |        |
| BC: <i>Time</i>                      | 1.36E-05  | 3.03E-06 | 4.5    |         |        |
| F1 intercept                         | 1.43E-02  | 2.77E-03 | 5.1    |         |        |
| F1 cov(intercept, slope)             | 1.92E-05  | 5.84E-05 | 0.3    |         |        |
| F1: <i>Time</i>                      | 1.23E-05  | 2.45E-06 | 5.0    |         |        |
| F2 intercept                         | 1.83E-02  | 3.67E-03 | 5.0    |         |        |

| Term                     | Var       | SE       | Var/SE | $\chi^2_1$ | P |
|--------------------------|-----------|----------|--------|------------|---|
| F2 cov(intercept, slope) | -1.53E-04 | 6.29E-05 | -2.4   |            |   |
| F2: <i>Time</i>          | 9.05E-06  | 1.89E-06 | 4.8    |            |   |
| DD intercept             | 9.38E-03  | 1.53E-03 | 6.1    |            |   |
| DD cov(intercept, slope) | 4.39E-05  | 5.17E-05 | 0.8    |            |   |
| DD: <i>Time</i>          | 2.08E-05  | 3.45E-06 | 6.0    |            |   |
| Residuals                | 1.72E-05  | 1.31E-06 | 13.1   |            |   |

<sup>a</sup>Variance was constrained to be positive and converged to zero.

Comments: Parameters are given for the overall model (**A**), and for maturity groups of immature individuals (**B**), females (**C**), and males (**D**). A colon between terms indicates the formation of the interaction. Some terms contain splines (*spl(Time)*) and deviations (*dev(Time)*) from linear trajectories. Among-individual (co)variances are given for each cross. Crosses are abbreviated with WW, wild; F1, first-generation hybrid; F2, second-generation hybrid; and DD, domesticated Atlantic salmon. The covariance between among-individual variances for intercepts and slopes (interaction of individual with *Time*) is abbreviated by 'cov'. For all among-group variance parameters, the results from REML-likelihood ratio tests (LRT) are given as test-statistic ( $\chi^2$ , all with 1 degree of freedom) and probability of being different from zero (P). LRT results for among-individual (co)variance terms are reported in supplementary Table S3.
