# Supplementary material
Source: PubMed Central journal article supplement (PMC3982675)
Supplement: 4b3cec6cfbacd3b53ba7319a9c6b0a13_genetics.114.161729-2.pdf [file 4b3cec6cfbacd3b53ba7319a9c6b0a13_genetics.114.161729-2.pdf]

**Table S2 Results for the analysis of number of individuals among all study-design term levels.**

| <b>Term</b>                      | <b>DF</b> | <b>DDF</b> | <b>F</b> | <b>P</b> |
|----------------------------------|-----------|------------|----------|----------|
| Intercept                        | 1         | 4          | >1000    | < 0.001  |
| Sediment                         | 1         | 4          | 0.7      | 0.439    |
| Salinity                         | 1         | 4          | 1.6      | 0.277    |
| Cross                            | 4         | 56         | 0.7      | 0.606    |
| Maturity                         | 2         | 56         | 48.8     | < 0.001  |
| Sediment:Salinity                | 1         | 4          | 4.8      | 0.095    |
| Sediment:Cross                   | 4         | 56         | 0.2      | 0.916    |
| Salinity:Cross                   | 4         | 56         | 0.2      | 0.932    |
| Sediment:Maturity                | 2         | 56         | 0.5      | 0.632    |
| Salinity:Maturity                | 2         | 56         | 0.1      | 0.888    |
| Cross:Maturity                   | 8         | 56         | 20.6     | < 0.001  |
| Sediment:Salinity:Cross          | 4         | 56         | 0.4      | 0.781    |
| Sediment:Salinity:Maturity       | 2         | 56         | 2.9      | 0.061    |
| Sediment:Cross:Maturity          | 8         | 56         | 1.5      | 0.181    |
| Salinity:Cross:Maturity          | 8         | 56         | 0.8      | 0.577    |
| Sediment:Salinity:Cross:Maturity | 8         | 56         | 2.9      | 0.008    |

Comments: The response is log-transformed (Ln) number of individuals per *Cross-by-Maturity* level and tank. Interactions among terms are indicated by a colon. Given for each term are degrees of freedom (DF), denominator DF (DDF), *F*-statistic (*F*) and probability (*P*). Among-tank stratum variance was 0.0169 with 4 DF, residual stratum variance was 0.0725 with 56 DF.
