# Supplementary material
Source: PubMed Central journal article supplement (PMC3982675)
Supplement: 32b24edf1cd1ad2c5eb3f0be9e89802a_genetics.114.161729-6.pdf [file 32b24edf1cd1ad2c5eb3f0be9e89802a_genetics.114.161729-6.pdf]

**Table S4 Variance parameters for the overall and maturity-group-specific growth models of body mass.**

| Term                                              | Var      | SE      | Var/SE | $\chi^2_1$ | P      |
|---------------------------------------------------|----------|---------|--------|------------|--------|
| <b>A overall</b>                                  |          |         |        |            |        |
| <i>spl(Time)</i>                                  | 7.0E-05  | 1.7E-04 | 0.4    | 0.2        | 0.643  |
| <i>spl(Time):Sediment</i>                         | 1.1E-04  | 1.1E-04 | 1.0    | 7.3        | 0.007  |
| <i>spl(Time):Cross:Maturity</i>                   | 5.3E-05  | 1.9E-05 | 2.7    | 52.2       | <0.001 |
| <i>dev(Time):Maturity</i>                         | 1.5E-04  | 1.1E-04 | 1.4    | 19.4       | <0.001 |
| <i>Sediment:Salinity:Cross:Maturity:dev(Time)</i> | 3.3E-05  | 1.1E-05 | 3.0    | 18.3       | <0.001 |
| <sup>a</sup> Tank                                 | 2.9E-09  | 1.4E-10 | 20.8   | NA         | NA     |
| <sup>a</sup> Tank: <i>Time</i>                    | 5.2E-11  | 2.5E-12 | 20.8   | NA         | NA     |
| Tank: <i>dev(Time)</i>                            | 7.4E-05  | 2.7E-05 | 2.7    | 94.3       | <0.001 |
| WW-females intercept                              | 7.4E-02  | 1.2E-02 | 6.0    |            |        |
| WW-females cov(intercept, slope)                  | 1.7E-05  | 3.9E-04 | 0.0    |            |        |
| WW-females: <i>Time</i>                           | 1.4E-04  | 2.5E-05 | 5.5    |            |        |
| WW-males intercept                                | 9.7E-02  | 1.6E-02 | 6.0    |            |        |
| WW-males cov(intercept, slope)                    | 3.8E-04  | 4.7E-04 | 0.8    |            |        |
| WW-males: <i>Time</i>                             | 1.6E-04  | 2.8E-05 | 5.6    |            |        |
| WW- immature intercept                            | 8.5E-02  | 2.2E-02 | 4.0    |            |        |
| WW- immature cov(intercept, slope)                | 1.5E-04  | 8.3E-04 | 0.2    |            |        |
| WW- immature: <i>Time</i>                         | 2.4E-04  | 6.4E-05 | 3.8    |            |        |
| BC-females intercept                              | 2.1E-01  | 4.5E-02 | 4.7    |            |        |
| BC-females cov(intercept, slope)                  | 2.7E-04  | 9.6E-04 | 0.3    |            |        |
| BC-females: <i>Time</i>                           | 1.8E-04  | 4.0E-05 | 4.4    |            |        |
| BC-males intercept                                | 1.1E-01  | 2.4E-02 | 4.6    |            |        |
| BC-males cov(intercept, slope)                    | 6.7E-04  | 8.2E-04 | 0.8    |            |        |
| BC-males: <i>Time</i>                             | 2.4E-04  | 5.4E-05 | 4.4    |            |        |
| BC- immature intercept                            | 8.6E-02  | 1.3E-02 | 6.7    |            |        |
| BC- immature cov(intercept, slope)                | -2.1E-04 | 5.2E-04 | -0.4   |            |        |
| BC- immature: <i>Time</i>                         | 2.7E-04  | 4.1E-05 | 6.4    |            |        |
| F1-females intercept                              | 1.8E-01  | 4.0E-02 | 4.4    |            |        |
| F1-females cov(intercept, slope)                  | 2.5E-03  | 1.0E-03 | 2.4    |            |        |
| F1-females: <i>Time</i>                           | 1.9E-04  | 4.6E-05 | 4.1    |            |        |
| F1-males intercept                                | 1.5E-01  | 2.8E-02 | 5.2    |            |        |
| F1-males cov(intercept, slope)                    | 1.8E-03  | 8.1E-04 | 2.3    |            |        |
| F1-males: <i>Time</i>                             | 2.1E-04  | 4.3E-05 | 4.9    |            |        |
| F1- immature intercept                            | 1.4E-01  | 2.0E-02 | 7.0    |            |        |
| F1- immature cov(intercept, slope)                | 2.1E-03  | 6.6E-04 | 3.2    |            |        |
| F1- immature: <i>Time</i>                         | 2.6E-04  | 3.9E-05 | 6.7    |            |        |

| Term                                                                 | Var      | SE      | Var/SE | $X_1^2$ | P     |
|----------------------------------------------------------------------|----------|---------|--------|---------|-------|
| F2-females intercept                                                 | 1.2E-01  | 3.0E-02 | 3.9    |         |       |
| F2-females cov(intercept, slope)                                     | 1.1E-03  | 9.3E-04 | 1.2    |         |       |
| F2-females: <i>Time</i>                                              | 2.0E-04  | 5.4E-05 | 3.7    |         |       |
| F2-males intercept                                                   | 1.6E-01  | 3.3E-02 | 5.0    |         |       |
| F2-males cov(intercept, slope)                                       | -1.1E-03 | 8.6E-04 | -1.2   |         |       |
| F2-males: <i>Time</i>                                                | 2.0E-04  | 4.3E-05 | 4.7    |         |       |
| F2- immature intercept                                               | 8.2E-02  | 1.1E-02 | 7.2    |         |       |
| F2-immature cov(intercept, slope)                                    | 1.2E-04  | 4.1E-04 | 0.3    |         |       |
| F2- immature: <i>Time</i>                                            | 2.0E-04  | 3.0E-05 | 6.8    |         |       |
| DD-females intercept                                                 | 4.7E-02  | 1.4E-02 | 3.4    |         |       |
| DD-females cov(intercept, slope)                                     | 1.0E-03  | 7.9E-04 | 1.3    |         |       |
| DD-females: <i>Time</i>                                              | 2.6E-04  | 8.2E-05 | 3.2    |         |       |
| DD-males intercept                                                   | 9.6E-02  | 1.6E-02 | 6.1    |         |       |
| DD-males cov(intercept, slope)                                       | 1.7E-03  | 7.0E-04 | 2.5    |         |       |
| DD-males: <i>Time</i>                                                | 3.4E-04  | 5.8E-05 | 5.9    |         |       |
| DD- immature intercept                                               | 6.7E-02  | 1.0E-02 | 6.4    |         |       |
| DD-immature cov(intercept, slope)                                    | 1.7E-03  | 6.1E-04 | 2.7    |         |       |
| DD- immature: <i>Time</i>                                            | 4.0E-04  | 6.4E-05 | 6.3    |         |       |
| WW-females:spl( <i>Time</i> )                                        | 2.4E-04  | 4.5E-05 | 5.3    |         |       |
| WW-males:spl( <i>Time</i> )                                          | 1.6E-04  | 3.3E-05 | 4.8    |         |       |
| WW-immature:spl( <i>Time</i> )                                       | 2.0E-04  | 5.8E-05 | 3.4    |         |       |
| BC-females:spl( <i>Time</i> )                                        | 2.1E-04  | 4.9E-05 | 4.4    |         |       |
| BC-males:spl( <i>Time</i> )                                          | 2.1E-04  | 5.6E-05 | 3.8    |         |       |
| BC-immature:spl( <i>Time</i> )                                       | 2.6E-04  | 4.3E-05 | 6.1    |         |       |
| F1-females:spl( <i>Time</i> )                                        | 4.3E-04  | 9.8E-05 | 4.4    |         |       |
| F1-males:spl( <i>Time</i> )                                          | 1.6E-04  | 4.0E-05 | 4.0    |         |       |
| F1-immature:spl( <i>Time</i> )                                       | 2.1E-04  | 3.4E-05 | 6.1    |         |       |
| F2-females:spl( <i>Time</i> )                                        | 3.9E-04  | 1.1E-04 | 3.7    |         |       |
| F2-males:spl( <i>Time</i> )                                          | 2.1E-04  | 5.1E-05 | 4.1    |         |       |
| F2-immature):IND:spl( <i>Time</i> )                                  | 2.3E-04  | 3.8E-05 | 6.2    |         |       |
| DD-females:spl( <i>Time</i> )                                        | 7.3E-04  | 2.0E-04 | 3.7    |         |       |
| DD-males:spl( <i>Time</i> )                                          | 3.0E-04  | 5.4E-05 | 5.6    |         |       |
| DD-immature:spl( <i>Time</i> )                                       | 2.3E-04  | 4.0E-05 | 5.7    |         |       |
| Residuals                                                            | 5.1E-04  | 2.5E-05 | 20.8   |         |       |
| <b>B immature</b>                                                    |          |         |        |         |       |
| spl( <i>Time</i> )                                                   | 4.0E-04  | 3.8E-04 | 1.1    | 2.9     | 0.089 |
| spl( <i>Time</i> ): <i>Sediment</i>                                  | 7.4E-05  | 8.6E-05 | 0.9    | 4.2     | 0.040 |
| spl( <i>Time</i> ): <i>Sediment</i> : <i>Salinity</i> : <i>Cross</i> | 2.4E-05  | 1.3E-05 | 1.9    | 7.3     | 0.007 |

| <b>Term</b>                     | <b>Var</b> | <b>SE</b> | <b>Var/SE</b> | <b>X<sub>1</sub><sup>2</sup></b> | <b>P</b> |
|---------------------------------|------------|-----------|---------------|----------------------------------|----------|
| <i>Sediment:Cross:dev(Time)</i> | 1.9E-05    | 1.5E-05   | 1.3           | 3.8                              | 0.051    |
| <sup>a</sup> Tank               | NA         | NA        | NA            | NA                               | NA       |
| <sup>a</sup> Tank:Time          | NA         | NA        | NA            | NA                               | NA       |
| Tank:dev(Time)                  | 8.2E-05    | 3.4E-05   | 2.4           | 58.4                             | <0.001   |
| WW intercept                    | 8.2E-02    | 2.1E-02   | 4.0           |                                  |          |
| WW cov(intercept, slope)        | 2.1E-04    | 8.1E-04   | 0.3           |                                  |          |
| WW:Time                         | 2.4E-04    | 6.3E-05   | 3.8           |                                  |          |
| BC intercept                    | 8.6E-02    | 1.3E-02   | 6.7           |                                  |          |
| BC cov(intercept, slope)        | -2.8E-04   | 5.2E-04   | -0.5          |                                  |          |
| BC:Time                         | 2.8E-04    | 4.3E-05   | 6.5           |                                  |          |
| F1 intercept                    | 1.4E-01    | 2.0E-02   | 7.0           |                                  |          |
| F1 cov(intercept, slope)        | 2.1E-03    | 6.7E-04   | 3.2           |                                  |          |
| F1:Time                         | 2.7E-04    | 4.0E-05   | 6.7           |                                  |          |
| F2 intercept                    | 8.1E-02    | 1.1E-02   | 7.2           |                                  |          |
| F2 cov(intercept, slope)        | 1.4E-04    | 4.1E-04   | 0.3           |                                  |          |
| F2:Time                         | 2.0E-04    | 2.9E-05   | 6.9           |                                  |          |
| DD intercept                    | 7.0E-02    | 1.1E-02   | 6.4           |                                  |          |
| DD cov(intercept, slope)        | 1.8E-03    | 6.2E-04   | 2.9           |                                  |          |
| DD:Time                         | 4.1E-04    | 6.4E-05   | 6.3           |                                  |          |
| WWspl(Time)                     | 2.1E-04    | 6.0E-05   | 3.5           |                                  |          |
| BC:spl(Time)                    | 3.0E-04    | 4.7E-05   | 6.3           |                                  |          |
| F1:spl(Time)                    | 2.4E-04    | 3.7E-05   | 6.4           |                                  |          |
| F2:spl(Time)                    | 2.8E-04    | 4.3E-05   | 6.5           |                                  |          |
| DD:spl(Time)                    | 2.6E-04    | 4.4E-05   | 5.9           |                                  |          |
| Residuals                       | 4.1E-04    | 3.2E-05   | 12.9          |                                  |          |
| <b>C females</b>                |            |           |               |                                  |          |
| <i>spl(Time):Sediment</i>       | 2.6E-04    | 1.9E-04   | 1.4           | 12.9                             | <0.001   |
| <i>spl(Time):Cross</i>          | 5.0E-05    | 3.4E-05   | 1.5           | 9.4                              | 0.002    |
| <sup>a</sup> Tank               | NA         | NA        | NA            | NA                               | NA       |
| <sup>a</sup> Tank:Time          | NA         | NA        | NA            | NA                               | NA       |
| <i>dev(Time):Tank</i>           | 7.4E-05    | 3.9E-05   | 1.9           | 12.4                             | <0.001   |
| WW intercept                    | 7.5E-02    | 1.2E-02   | 6.0           |                                  |          |
| WW cov(intercept, slope)        | 1.9E-05    | 3.9E-04   | 0.0           |                                  |          |
| WW:Time                         | 1.4E-04    | 2.5E-05   | 5.4           |                                  |          |
| BC intercept                    | 2.1E-01    | 4.5E-02   | 4.7           |                                  |          |
| BC cov(intercept, slope)        | 2.9E-04    | 9.5E-04   | 0.3           |                                  |          |
| BC:Time                         | 1.8E-04    | 4.0E-05   | 4.4           |                                  |          |
| F1 intercept                    | 1.7E-01    | 3.9E-02   | 4.4           |                                  |          |

| Term                     | Var      | SE      | Var/SE | $X_1^2$ | P      |
|--------------------------|----------|---------|--------|---------|--------|
| F1 cov(intercept, slope) | 2.5E-03  | 1.0E-03 | 2.5    |         |        |
| F1:Time                  | 1.8E-04  | 4.5E-05 | 4.1    |         |        |
| F2 intercept             | 1.2E-01  | 3.0E-02 | 3.9    |         |        |
| F2 cov(intercept, slope) | 1.1E-03  | 9.4E-04 | 1.2    |         |        |
| F2:Time                  | 2.1E-04  | 5.6E-05 | 3.7    |         |        |
| DD intercept             | 4.8E-02  | 1.4E-02 | 3.4    |         |        |
| DD cov(intercept, slope) | 1.1E-03  | 8.0E-04 | 1.4    |         |        |
| DD:Time                  | 2.6E-04  | 8.2E-05 | 3.2    |         |        |
| WWspl(Time)              | 2.1E-04  | 4.4E-05 | 4.9    |         |        |
| BC:spl(Time)             | 2.0E-04  | 4.8E-05 | 4.1    |         |        |
| F1:spl(Time)             | 3.9E-04  | 9.3E-05 | 4.2    |         |        |
| F2:spl(Time)             | 3.4E-04  | 1.0E-04 | 3.4    |         |        |
| DD:spl(Time)             | 7.4E-04  | 2.1E-04 | 3.6    |         |        |
| Residuals                | 6.1E-04  | 5.9E-05 | 10.3   |         |        |
| <b>D males</b>           |          |         |        |         |        |
| spl(Time):Cross          | 1.5E-04  | 7.0E-05 | 2.1    | 89.3    | <0.001 |
| Sediment:dev(Time)       | 1.5E-04  | 1.2E-04 | 1.3    | 12.4    | <0.001 |
| <sup>a</sup> Tank        | NA       | NA      | NA     | NA      | NA     |
| Tank:Time                | 1.3E-06  | 4.3E-06 | 0.3    | 0.1     | 0.756  |
| Tank:spl(Time)           | 3.8E-05  | 2.0E-05 | 1.9    | 20.9    | <0.001 |
| WW intercept             | 9.9E-02  | 1.6E-02 | 6.0    |         |        |
| WW cov(intercept, slope) | 3.8E-04  | 4.8E-04 | 0.8    |         |        |
| WW:Time                  | 1.6E-04  | 2.8E-05 | 5.6    |         |        |
| BC intercept             | 1.1E-01  | 2.4E-02 | 4.6    |         |        |
| BC cov(intercept, slope) | 5.8E-04  | 8.1E-04 | 0.7    |         |        |
| BC:Time                  | 2.4E-04  | 5.4E-05 | 4.3    |         |        |
| F1 intercept             | 1.4E-01  | 2.8E-02 | 5.2    |         |        |
| F1 cov(intercept, slope) | 1.8E-03  | 8.4E-04 | 2.1    |         |        |
| F1:Time                  | 2.3E-04  | 4.7E-05 | 4.9    |         |        |
| F2 intercept             | 1.6E-01  | 3.3E-02 | 5.0    |         |        |
| F2 cov(intercept, slope) | -1.1E-03 | 8.6E-04 | -1.2   |         |        |
| F2:Time                  | 2.1E-04  | 4.4E-05 | 4.7    |         |        |
| DD intercept             | 9.7E-02  | 1.6E-02 | 6.1    |         |        |
| DD cov(intercept, slope) | 1.7E-03  | 7.0E-04 | 2.4    |         |        |
| DD:Time                  | 3.3E-04  | 5.7E-05 | 5.9    |         |        |
| WWspl(Time)              | 1.4E-04  | 3.3E-05 | 4.4    |         |        |
| BC:spl(Time)             | 1.8E-04  | 5.1E-05 | 3.4    |         |        |
| F1:spl(Time)             | 1.4E-04  | 3.9E-05 | 3.7    |         |        |

| <b>Term</b>           | <b>Var</b> | <b>SE</b> | <b>Var/SE</b> | <b><math>\chi^2_1</math></b> | <b>P</b> |
|-----------------------|------------|-----------|---------------|------------------------------|----------|
| F2:spl( <i>Time</i> ) | 1.6E-04    | 4.6E-05   | 3.6           |                              |          |
| DD:spl( <i>Time</i> ) | 2.8E-04    | 5.4E-05   | 5.2           |                              |          |
| Residuals             | 6.0E-04    | 4.7E-05   | 12.7          |                              |          |

<sup>a</sup>Variance was constrained to be positive and converged to zero.

Comments: Parameters are given for the overall model (**A**), and for maturity groups of immature individuals (**B**), females (**C**), and males (**D**). A colon between terms indicates the formation of the interaction. Some terms contain splines (spl(*Time*)) and deviations (dev(*Time*)) from linear trajectories. Among-individual (co)variances are given for each cross. Crosses are abbreviated with WW, wild; F1, first-generation hybrid; F2, second-generation hybrid; and DD, domesticated Atlantic salmon. The covariance between among-individual variances for intercepts and slopes (interaction of individual with *Time*) is abbreviated by 'cov'. For all among-group variance parameters, the results from REML-likelihood ratio tests (LRT) are given as test-statistic ( $\chi^2$ , all with 1 degree of freedom) and probability of being different from zero (P). LRT results for among-individual (co)variance terms are reported in supplementary Table S3.
