# Supplementary material
Source: PubMed Central journal article supplement (PMC3982675)
Supplement: 97a5b49c0a4f5cb9682774548fae25c8_genetics.114.161729-4.pdf [file 97a5b49c0a4f5cb9682774548fae25c8_genetics.114.161729-4.pdf]

**Table S1** Number of individuals for all factor levels of the experimental design.

| Cross   | Maturity | fresh | salt | clear | sediments | fresh:clear | fresh:sediments | salt:clear | salt:sediments | Overall |
|---------|----------|-------|------|-------|-----------|-------------|-----------------|------------|----------------|---------|
| WW      | immature | 17    | 16   | 15    | 18        | 6           | 11              | 9          | 7              | 33      |
| WW      | female   | 37    | 37   | 40    | 34        | 19          | 18              | 21         | 16             | 74      |
| WW      | male     | 40    | 35   | 37    | 38        | 22          | 18              | 15         | 20             | 75      |
| WW      | all      | 94    | 88   | 92    | 90        | 47          | 47              | 45         | 44             | 183     |
| BC      | immature | 49    | 43   | 45    | 47        | 27          | 22              | 18         | 25             | 92      |
| BC      | female   | 23    | 23   | 20    | 26        | 8           | 15              | 12         | 11             | 46      |
| BC      | male     | 23    | 21   | 25    | 19        | 13          | 10              | 12         | 9              | 44      |
| BC      | all      | 95    | 87   | 90    | 92        | 48          | 47              | 42         | 45             | 182     |
| F1      | immature | 49    | 51   | 53    | 47        | 24          | 25              | 29         | 22             | 100     |
| F1      | female   | 17    | 23   | 16    | 24        | 8           | 9               | 8          | 15             | 40      |
| F1      | male     | 29    | 26   | 28    | 27        | 15          | 14              | 13         | 13             | 55      |
| F1      | all      | 95    | 100  | 97    | 98        | 47          | 48              | 50         | 50             | 195     |
| F2      | immature | 54    | 52   | 59    | 47        | 30          | 24              | 29         | 23             | 106     |
| F2      | female   | 18    | 14   | 16    | 16        | 9           | 9               | 7          | 7              | 32      |
| F2      | male     | 24    | 27   | 20    | 31        | 9           | 15              | 11         | 16             | 51      |
| F2      | all      | 96    | 93   | 95    | 94        | 48          | 48              | 47         | 46             | 189     |
| DD      | immature | 38    | 47   | 45    | 40        | 19          | 19              | 26         | 21             | 85      |
| DD      | female   | 14    | 10   | 11    | 13        | 4           | 10              | 7          | 3              | 24      |
| DD      | male     | 40    | 37   | 39    | 38        | 24          | 16              | 15         | 22             | 77      |
| DD      | all      | 92    | 94   | 95    | 91        | 47          | 45              | 48         | 46             | 186     |
| Overall | all      | 472   | 462  | 469   | 465       | 237         | 235             | 232        | 230            | 934     |

Comments: Numbers are given for the three maturity groups (*Maturity*) between the crosses of wild (WW) and domesticated (DD) Atlantic salmon, reciprocal first- (F1) and second-generation hybrids (F2), and the reciprocal wild backcross (BC, WW x F1). Combinations of environmental factor levels for *Salinity* (levels: fresh, salt) and *Sediment* (levels: clear, sediments) are indicated by a colon. Results from an analysis of these occurrences, additionally accounting for occurrences for each tank, can be found in Table S2.
