# Supplementary material
Source: PubMed Central journal article supplement (PMC3982675)
Supplement: 42151512f57eb65dde5af6d4018f0103_genetics.114.161729-3.pdf [file 42151512f57eb65dde5af6d4018f0103_genetics.114.161729-3.pdf]

**Table S5 Variance parameters for the overall and maturity-group-specific growth models of fork length.**

| Term                               | Var      | SE      | Var/SE | $\chi^2_1$ | P      |
|------------------------------------|----------|---------|--------|------------|--------|
| <b>A: overall</b>                  |          |         |        |            |        |
| <i>spl(Time):Maturity</i>          | 6.6E-06  | 4.0E-06 | 1.7    | 24.2       | <0.001 |
| <i>spl(Time):Cross:Maturity</i>    | 5.6E-07  | 2.7E-07 | 2.1    | 15.6       | <0.001 |
| <i>dev(Time)</i>                   | 3.2E-06  | 5.0E-06 | 0.6    | 1.5        | 0.219  |
| <i>Sediment:Salinity:dev(Time)</i> | 2.5E-06  | 1.7E-06 | 1.5    | 3.0        | 0.083  |
| <i>Sediment:Cross:dev(Time)</i>    | 2.3E-07  | 2.0E-07 | 1.2    | 2.7        | 0.101  |
| <i>Sediment:Maturity:dev(Time)</i> | 8.1E-07  | 6.3E-07 | 1.3    | 8.4        | 0.004  |
| <sup>a</sup> Tank                  | NA       | NA      | NA     | NA         | NA     |
| Tank:lin( <i>Time</i> )            | 1.6E-08  | 8.0E-08 | 0.2    | 0.05       | 0.829  |
| Tank:spl( <i>Time</i> )            | 7.1E-07  | 4.1E-07 | 1.7    | 24.6       | <0.001 |
| WW-females:spl( <i>Time</i> )      | 5.2E-06  | 1.1E-06 | 4.8    |            |        |
| WW-males:spl( <i>Time</i> )        | 2.6E-06  | 7.0E-07 | 3.8    |            |        |
| WW-immature:spl( <i>Time</i> )     | 9.9E-06  | 2.7E-06 | 3.7    |            |        |
| BC-females:spl( <i>Time</i> )      | 5.6E-06  | 1.4E-06 | 4.0    |            |        |
| BC-males:spl( <i>Time</i> )        | 4.5E-06  | 1.3E-06 | 3.5    |            |        |
| BC-immature:spl( <i>Time</i> )     | 9.0E-06  | 1.5E-06 | 6.0    |            |        |
| F1-females:spl( <i>Time</i> )      | 1.2E-05  | 2.7E-06 | 4.4    |            |        |
| F1-males:spl( <i>Time</i> )        | 4.0E-06  | 1.0E-06 | 3.8    |            |        |
| F1-immature:spl( <i>Time</i> )     | 6.4E-06  | 1.1E-06 | 5.7    |            |        |
| F2-females:spl( <i>Time</i> )      | 9.0E-06  | 2.5E-06 | 3.7    |            |        |
| F2-males:spl( <i>Time</i> )        | 2.7E-06  | 8.8E-07 | 3.1    |            |        |
| F2-immature:spl( <i>Time</i> )     | 7.2E-06  | 1.2E-06 | 6.0    |            |        |
| DD-females:spl( <i>Time</i> )      | 1.9E-05  | 5.2E-06 | 3.5    |            |        |
| DD-males:spl( <i>Time</i> )        | 1.1E-05  | 2.0E-06 | 5.4    |            |        |
| DD-immature:spl( <i>Time</i> )     | 1.2E-05  | 2.1E-06 | 5.9    |            |        |
| WW-females intercept               | 6.8E-03  | 1.1E-03 | 6.0    |            |        |
| WW-females cov(intercept, slope)   | -3.9E-05 | 3.0E-05 | -1.3   |            |        |
| WW-females:Time                    | 9.1E-06  | 1.6E-06 | 5.7    |            |        |
| WW-males intercept                 | 1.1E-02  | 1.8E-03 | 6.1    |            |        |
| WW-males cov(intercept, slope)     | -6.0E-05 | 3.2E-05 | -1.8   |            |        |
| WW-males:Time                      | 6.5E-06  | 1.1E-06 | 5.7    |            |        |
| WW- immature intercept             | 6.6E-03  | 1.7E-03 | 4.0    |            |        |
| WW- immature cov(intercept, slope) | -5.8E-05 | 7.6E-05 | -0.8   |            |        |
| WW- immature:Time                  | 2.7E-05  | 6.8E-06 | 3.9    |            |        |
| BC-females intercept               | 2.0E-02  | 4.3E-03 | 4.7    |            |        |
| BC-females cov(intercept, slope)   | -1.5E-04 | 8.0E-05 | -1.8   |            |        |

| Term                               | Var      | SE       | Var/SE | $X_1^2$ | P     |
|------------------------------------|----------|----------|--------|---------|-------|
| BC-females: <i>Time</i>            | 1.3E-05  | 2.8E-06  | 4.6    |         |       |
| BC-males intercept                 | 1.3E-02  | 2.7E-03  | 4.6    |         |       |
| BC-males cov(intercept, slope)     | -9.7E-05 | 6.6E-05  | -1.5   |         |       |
| BC-males: <i>Time</i>              | 1.4E-05  | 3.0E-06  | 4.5    |         |       |
| BC- immature intercept             | 8.2E-03  | 1.2E-03  | 6.7    |         |       |
| BC- immature cov(intercept, slope) | -9.5E-05 | 3.8E-05  | -2.5   |         |       |
| BC- immature: <i>Time</i>          | 1.4E-05  | 2.2E-06  | 6.5    |         |       |
| F1-females intercept               | 1.6E-02  | 3.6E-03  | 4.4    |         |       |
| F1-females cov(intercept, slope)   | 3.5E-05  | 7.3E-05  | 0.5    |         |       |
| F1-females: <i>Time</i>            | 1.3E-05  | 3.0E-06  | 4.2    |         |       |
| F1-males intercept                 | 1.5E-02  | 2.8E-03  | 5.2    |         |       |
| F1-males cov(intercept, slope)     | 2.4E-05  | 5.7E-05  | 0.4    |         |       |
| F1-males: <i>Time</i>              | 1.1E-05  | 2.3E-06  | 5.0    |         |       |
| F1- immature intercept             | 1.2E-02  | 1.7E-03  | 7.0    |         |       |
| F1- immature cov(intercept, slope) | 6.7E-05  | 4.1E-05  | 1.6    |         |       |
| F1- immature: <i>Time</i>          | 1.3E-05  | 2.0E-06  | 6.8    |         |       |
| F2-females intercept               | 1.1E-02  | 2.8E-03  | 3.9    |         |       |
| F2-females cov(intercept, slope)   | -1.2E-04 | 6.7E-05  | -1.7   |         |       |
| F2-females: <i>Time</i>            | 1.1E-05  | 2.8E-06  | 3.8    |         |       |
| F2-males intercept                 | 1.8E-02  | 3.7E-03  | 5.0    |         |       |
| F2-males cov(intercept, slope)     | -1.6E-04 | 6.3E-05  | -2.5   |         |       |
| F2-males: <i>Time</i>              | 8.9E-06  | 1.9E-06  | 4.7    |         |       |
| F2- immature intercept             | 8.0E-03  | 1.1E-03  | 7.2    |         |       |
| F2- immature cov(intercept, slope) | -9.9E-05 | 3.1E-05  | -3.1   |         |       |
| F2- immature: <i>Time</i>          | 1.1E-05  | 1.6E-06  | 6.9    |         |       |
| DD-females intercept               | 4.9E-03  | 1.4E-03  | 3.4    |         |       |
| DD-females cov(intercept, slope)   | 7.8E-05  | 8.1E-05  | 1.0    |         |       |
| DD-females: <i>Time</i>            | 2.9E-05  | 8.7E-06  | 3.3    |         |       |
| DD-males intercept                 | 9.3E-03  | 1.5E-03  | 6.1    |         |       |
| DD-males cov(intercept, slope)     | 4.7E-05  | 5.2E-05  | 0.9    |         |       |
| DD-males: <i>Time</i>              | 2.1E-05  | 3.5E-06  | 6.0    |         |       |
| DD- immature intercept             | 5.8E-03  | 9.0E-04  | 6.4    |         |       |
| DD- immature cov(intercept, slope) | 4.3E-05  | 4.0E-05  | 1.1    |         |       |
| DD- immature: <i>Time</i>          | 2.2E-05  | 3.5E-06  | 6.3    |         |       |
| Residuals                          | 2.0E-05  | 8.6E-07  | 23.0   |         |       |
| <b>B: immature</b>                 |          |          |        |         |       |
| spl( <i>Time</i> )                 | 1.20E-05 | 2.15E-05 | 0.6    | 0.5     | 0.462 |
| spl( <i>Time</i> ): <i>Cross</i>   | 8.76E-07 | 6.43E-07 | 1.4    | 8.3     | 0.004 |

| Term                            | Var       | SE       | Var/SE | $X_1^2$ | P      |
|---------------------------------|-----------|----------|--------|---------|--------|
| <i>spl(Time):Sediment</i>       | 2.57E-06  | 2.72E-06 | 0.9    | 11.3    | <0.001 |
| <i>spl(Time):Salinity</i>       | 1.66E-06  | 2.07E-06 | 0.8    | 2.7     | 0.100  |
| <i>dev(Time)</i>                | 9.84E-06  | 1.98E-05 | 0.5    | 0.5     | 0.474  |
| <i>Salinity:Cross:dev(Time)</i> | 9.07E-07  | 6.70E-07 | 1.4    | 4.1     | 0.042  |
| <i>dev(Time):Tank</i>           | 2.30E-06  | 1.16E-06 | 2.0    | 22.6    | <0.001 |
| <sup>a</sup> Tank               | NA        | NA       | NA     | NA      | NA     |
| Tank:lin( <i>Time</i> )         | 2.33E-12  | 1.51E-13 | 15.4   | 1.6     | 0.204  |
| WW: <i>spl(Time)</i>            | 9.31E-06  | 2.62E-06 | 3.6    |         |        |
| BC: <i>spl(Time)</i>            | 8.29E-06  | 1.47E-06 | 5.6    |         |        |
| F1: <i>spl(Time)</i>            | 5.80E-06  | 1.10E-06 | 5.3    |         |        |
| F2: <i>spl(Time)</i>            | 6.29E-06  | 1.13E-06 | 5.6    |         |        |
| DD: <i>spl(Time)</i>            | 1.07E-05  | 1.93E-06 | 5.5    |         |        |
| WW intercept                    | 6.46E-03  | 1.63E-03 | 4.0    |         |        |
| WW cov(intercept, slope)        | -4.58E-05 | 7.43E-05 | -0.6   |         |        |
| WW: <i>Time</i>                 | 2.61E-05  | 6.68E-06 | 3.9    |         |        |
| BC intercept                    | 8.17E-03  | 1.22E-03 | 6.7    |         |        |
| BC cov(intercept, slope)        | -9.47E-05 | 3.82E-05 | -2.5   |         |        |
| BC: <i>Time</i>                 | 1.44E-05  | 2.22E-06 | 6.5    |         |        |
| F1 intercept                    | 1.20E-02  | 1.70E-03 | 7.0    |         |        |
| F1 cov(intercept, slope)        | 6.56E-05  | 4.16E-05 | 1.6    |         |        |
| F1: <i>Time</i>                 | 1.34E-05  | 1.99E-06 | 6.7    |         |        |
| F2 intercept                    | 7.88E-03  | 1.10E-03 | 7.2    |         |        |
| F2 cov(intercept, slope)        | -9.83E-05 | 3.08E-05 | -3.2   |         |        |
| F2: <i>Time</i>                 | 1.07E-05  | 1.56E-06 | 6.9    |         |        |
| DD intercept                    | 5.88E-03  | 9.24E-04 | 6.4    |         |        |
| DD cov(intercept, slope)        | 4.60E-05  | 4.03E-05 | 1.1    |         |        |
| DD: <i>Time</i>                 | 2.20E-05  | 3.48E-06 | 6.3    |         |        |
| Residuals                       | 2.30E-05  | 1.49E-06 | 15.4   |         |        |
| <b>C: females</b>               |           |          |        |         |        |
| <i>spl(Time)</i>                | 2.6E-06   | 3.7E-06  | 0.7    | 2.5     | 0.112  |
| <i>spl(Time):Tank</i>           | 1.2E-06   | 7.1E-07  | 1.7    | 9.5     | 0.002  |
| <i>Sediment:dev(Time)</i>       | 3.2E-06   | 3.3E-06  | 1.0    | 3.9     | 0.049  |
| <sup>a</sup> Tank               | NA        | NA       | NA     | NA      | NA     |
| Tank:lin( <i>Time</i> )         | 5.0E-07   | 5.3E-07  | 0.9    | 1.6     | 0.204  |
| WW: <i>spl(Time)</i>            | 5.3E-06   | 1.1E-06  | 4.9    |         |        |
| BC: <i>spl(Time)</i>            | 6.5E-06   | 1.6E-06  | 4.1    |         |        |
| F1: <i>spl(Time)</i>            | 1.1E-05   | 2.6E-06  | 4.4    |         |        |
| F2: <i>spl(Time)</i>            | 1.0E-05   | 2.7E-06  | 3.8    |         |        |

| Term                                 | Var       | SE       | Var/SE | $X_1^2$ | P      |
|--------------------------------------|-----------|----------|--------|---------|--------|
| DD:spl( <i>Time</i> )                | 2.4E-05   | 6.3E-06  | 3.8    |         |        |
| WW intercept                         | 6.7E-03   | 1.1E-03  | 6.0    |         |        |
| WW cov(intercept, slope)             | -4.2E-05  | 3.0E-05  | -1.4   |         |        |
| WW: <i>Time</i>                      | 8.9E-06   | 1.6E-06  | 5.7    |         |        |
| BC intercept                         | 2.0E-02   | 4.3E-03  | 4.7    |         |        |
| BC cov(intercept, slope)             | -1.4E-04  | 7.8E-05  | -1.8   |         |        |
| BC: <i>Time</i>                      | 1.2E-05   | 2.7E-06  | 4.5    |         |        |
| F1 intercept                         | 1.5E-02   | 3.5E-03  | 4.4    |         |        |
| F1 cov(intercept, slope)             | 4.0E-05   | 7.3E-05  | 0.5    |         |        |
| F1: <i>Time</i>                      | 1.3E-05   | 3.1E-06  | 4.2    |         |        |
| F2 intercept                         | 1.1E-02   | 2.8E-03  | 3.9    |         |        |
| F2 cov(intercept, slope)             | -9.8E-05  | 6.8E-05  | -1.4   |         |        |
| F2: <i>Time</i>                      | 1.1E-05   | 3.1E-06  | 3.7    |         |        |
| DD intercept                         | 4.8E-03   | 1.4E-03  | 3.4    |         |        |
| DD cov(intercept, slope)             | 7.7E-05   | 7.9E-05  | 1.0    |         |        |
| DD: <i>Time</i>                      | 2.8E-05   | 8.6E-06  | 3.3    |         |        |
| Residuals                            | 1.7E-05   | 1.6E-06  | 10.9   |         |        |
| <b>D: males</b>                      |           |          |        |         |        |
| spl( <i>Time</i> )                   | 1.46E-06  | 1.82E-06 | 0.8    | 8.6     | 0.003  |
| Tank                                 | 5.04E-05  | 2.14E-04 | 0.2    | 0.1     | 0.806  |
| <sup>a</sup> Tank:lin( <i>Time</i> ) | NA        | NA       | NA     | NA      | NA     |
| Cross:dev( <i>Time</i> )             | 6.42E-07  | 4.92E-07 | 1.3    | 5.7     | 0.017  |
| Sediment:Salinity:dev( <i>Time</i> ) | 3.24E-06  | 1.63E-06 | 2.0    | 61.6    | <0.001 |
| WW:spl( <i>Time</i> )                | 2.82E-06  | 7.07E-07 | 4.0    |         |        |
| BC:spl( <i>Time</i> )                | 5.04E-06  | 1.37E-06 | 3.7    |         |        |
| F1:spl( <i>Time</i> )                | 4.82E-06  | 1.16E-06 | 4.1    |         |        |
| F2:spl( <i>Time</i> )                | 3.02E-06  | 8.99E-07 | 3.4    |         |        |
| DD:spl( <i>Time</i> )                | 1.30E-05  | 2.29E-06 | 5.7    |         |        |
| WW intercept                         | 1.08E-02  | 1.80E-03 | 6.0    |         |        |
| WW cov(intercept, slope)             | -6.33E-05 | 3.29E-05 | -1.9   |         |        |
| WW: <i>Time</i>                      | 6.55E-06  | 1.14E-06 | 5.7    |         |        |
| BC intercept                         | 1.25E-02  | 2.72E-03 | 4.6    |         |        |
| BC cov(intercept, slope)             | -9.85E-05 | 6.59E-05 | -1.5   |         |        |
| BC: <i>Time</i>                      | 1.36E-05  | 3.03E-06 | 4.5    |         |        |
| F1 intercept                         | 1.43E-02  | 2.77E-03 | 5.1    |         |        |
| F1 cov(intercept, slope)             | 1.92E-05  | 5.84E-05 | 0.3    |         |        |
| F1: <i>Time</i>                      | 1.23E-05  | 2.45E-06 | 5.0    |         |        |
| F2 intercept                         | 1.83E-02  | 3.67E-03 | 5.0    |         |        |

| Term                     | Var       | SE       | Var/SE | $\chi^2_1$ | P |
|--------------------------|-----------|----------|--------|------------|---|
| F2 cov(intercept, slope) | -1.53E-04 | 6.29E-05 | -2.4   |            |   |
| F2: <i>Time</i>          | 9.05E-06  | 1.89E-06 | 4.8    |            |   |
| DD intercept             | 9.38E-03  | 1.53E-03 | 6.1    |            |   |
| DD cov(intercept, slope) | 4.39E-05  | 5.17E-05 | 0.8    |            |   |
| DD: <i>Time</i>          | 2.08E-05  | 3.45E-06 | 6.0    |            |   |
| Residuals                | 1.72E-05  | 1.31E-06 | 13.1   |            |   |

<sup>a</sup>Variance was constrained to be positive and converged to zero.

Comments: Parameters are given for the overall model (**A**), and for maturity groups of immature individuals (**B**), females (**C**), and males (**D**). A colon between terms indicates the formation of the interaction. Some terms contain splines (*spl(Time)*) and deviations (*dev(Time)*) from linear trajectories. Among-individual (co)variances are given for each cross. Crosses are abbreviated with WW, wild; F1, first-generation hybrid; F2, second-generation hybrid; and DD, domesticated Atlantic salmon. The covariance between among-individual variances for intercepts and slopes (interaction of individual with *Time*) is abbreviated by 'cov'. For all among-group variance parameters, the results from REML-likelihood ratio tests (LRT) are given as test-statistic ( $\chi^2$ , all with 1 degree of freedom) and probability of being different from zero (P). LRT results for among-individual (co)variance terms are reported in supplementary Table S3.
